# Supplementary material
Source: PubMed Central journal article supplement (PMC11037458)
Supplement: qai-96-92-s007.pdf [file qai-96-92-s007.pdf]

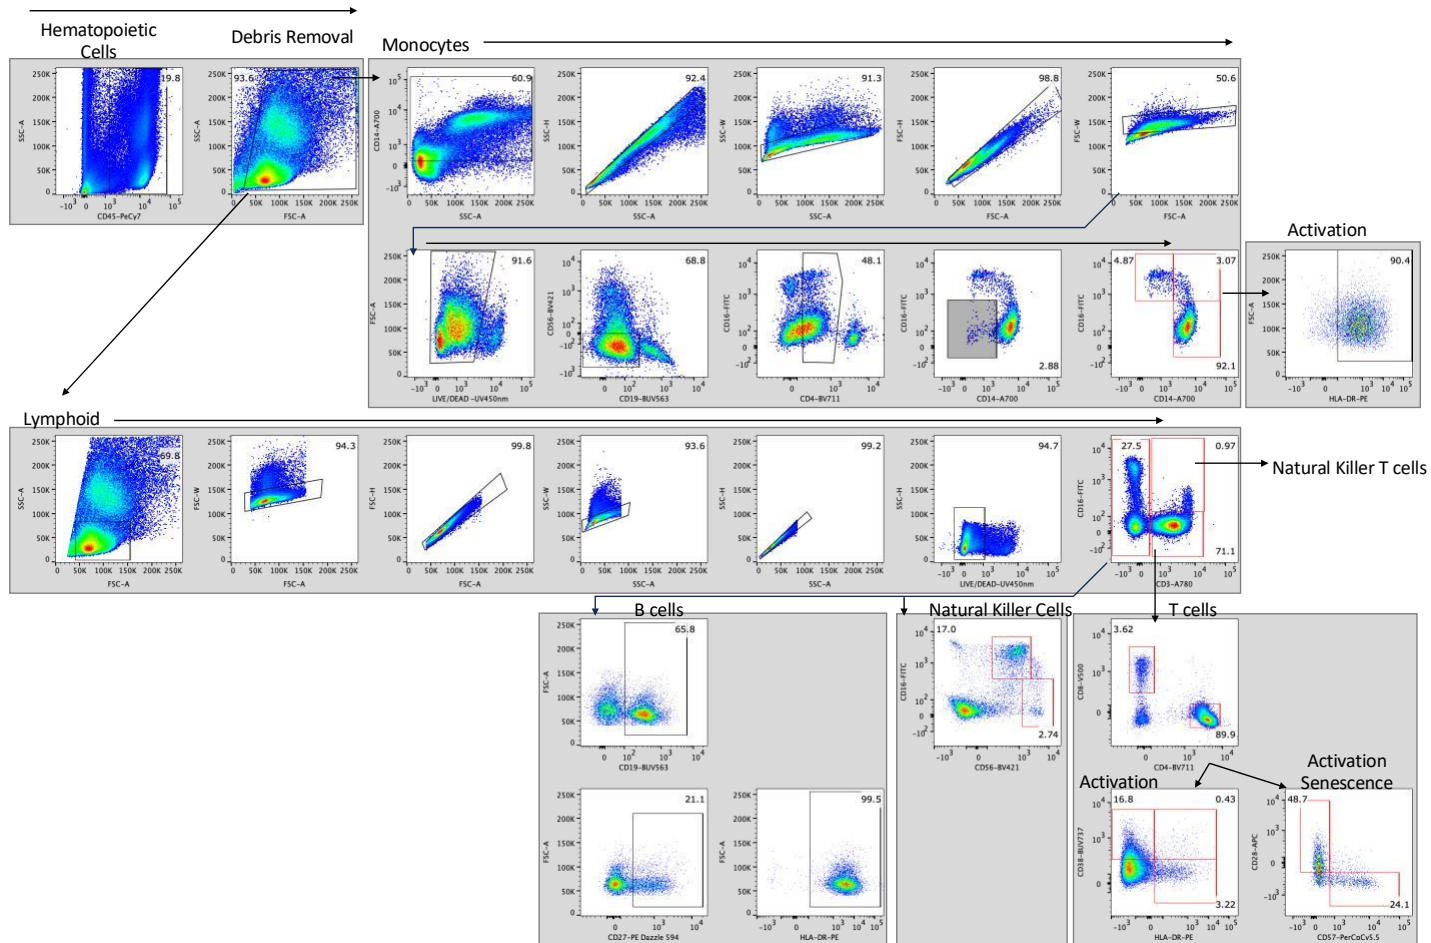

**Supplemental Digital Content 3. Gating strategy for Immune cell population panel. Approach for identifying monocytes, NK cells, B cells, and T cells.**
