# Supplementary material
Source: PubMed Central journal article supplement (PMC11037458)
Supplement: qai-96-92-s008.pdf [file qai-96-92-s008.pdf]

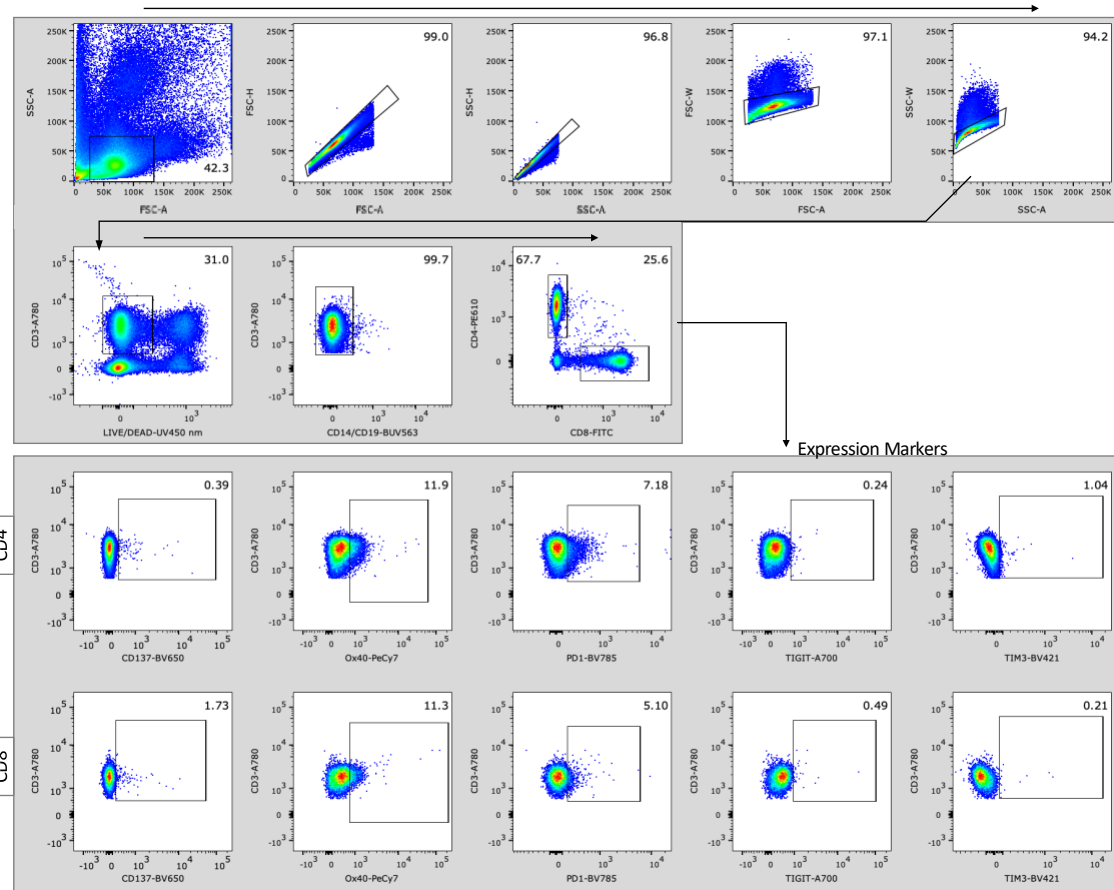

**Supplemental Digital Content 4. Gating strategy for Activation/Exhaustion panel.** Approach for identifying T cells expressing various activation or exhaustion markers.
