# Supplementary material
Source: PubMed Central journal article supplement (PMC11037458)
Supplement: qai-96-92-s009.pdf [file qai-96-92-s009.pdf]

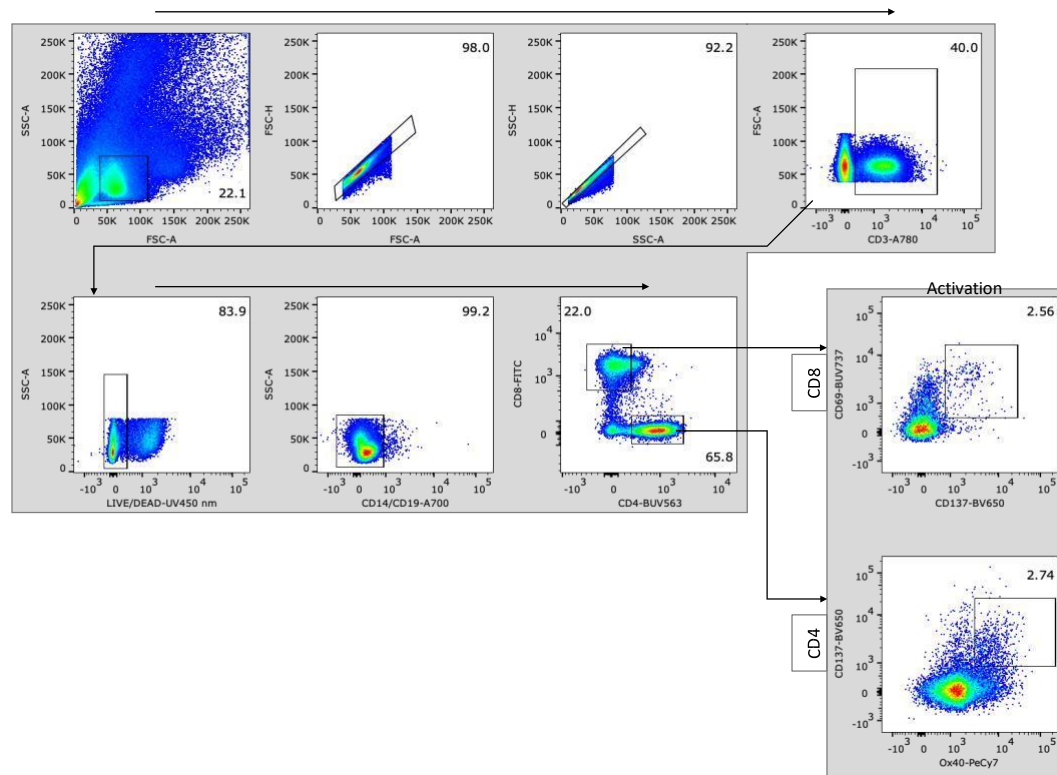

**Supplemental Digital Content 5. Gating strategy for AIM panel.** Approach for identifying SARS-CoV-2-specific T cells.
