# Supplementary material
Source: PubMed Central journal article supplement (PMC11037458)
Supplement: qai-96-92-s010.pdf [file qai-96-92-s010.pdf]

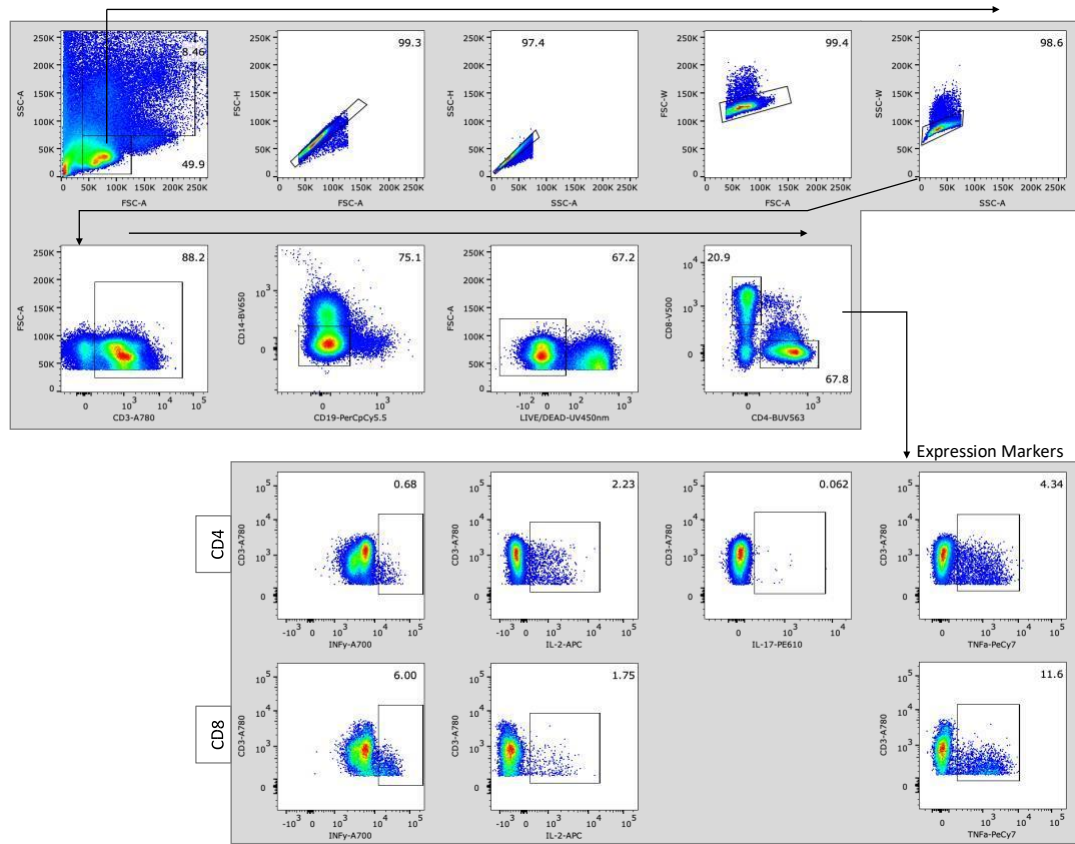

**Supplemental Digital Content 6. Gating strategy for ICS panel. Approach for identifying SARS-CoV-2-specific T cell cytokine production.**
