# Supplementary material
Source: PubMed Central journal article supplement (PMC11037458)
Supplement: qai-96-92-s011.pdf [file qai-96-92-s011.pdf]

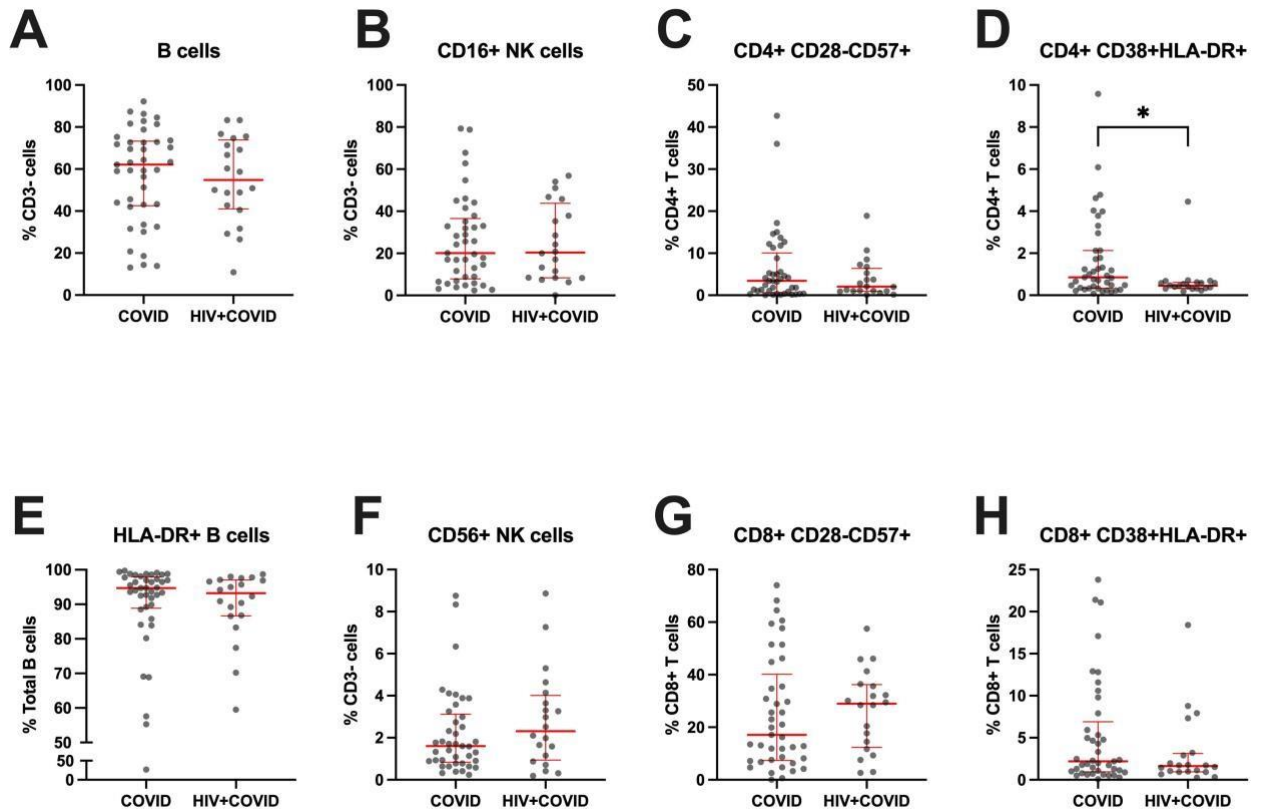

**Supplemental Digital Content 8. Immune cell populations.** Frequencies of B cells, NK cells, and CD4+ and CD8+ T cells. COVID – HIV-uninfected participants experiencing acute COVID-19. HIV+COVID – HIV-positive participants experiencing acute COVID-19. Red bars denote median and interquartile range. P values determined by Mann Whitney U test.\*  $p \leq 0.05$
